# Supplementary material for: Mechanistic investigation of a visible light mediated dehalogenation/cyclisation reaction using iron(iii), iridium(iii) and ruthenium(ii) photosensitizers
Source: Royal Society of Chemistry journal article supplement (doi:10.1039/d1cy01771c), 2021-01-01
Supplement: d1cy01771c1.pdf [file d1cy01771c1.pdf]

## Supporting Information

### Mechanistic Investigation of a Visible Light Mediated Dehalogenation/Cyclisation Reaction using Iron(III), Iridium(III) and Ruthenium(II) Photosensitizers

Akin Aydogan,<sup>1</sup> Rachel E. Bangle,<sup>2</sup> Simon De Kreijger,<sup>1</sup> John C. Dickenson,<sup>2</sup> Michael L. Singleton,<sup>1</sup> Emilie Cauët,<sup>3</sup> Alejandro Cadranel,<sup>4</sup> Gerald J. Meyer,<sup>2</sup> Benjamin Elias<sup>1</sup> Renato N. Sampaio,<sup>2,5,\*</sup> and Ludovic Troian-Gautier<sup>1,\*</sup>

<sup>1</sup>Université catholique de Louvain (UCLouvain), Institut de la Matière Condensée et des Nanosciences (IMCN), Molecular Chemistry, Materials and Catalysis (MOST), Place Louis Pasteur 1, bte L4.01.02, 1348 Louvain-la-Neuve, Belgium

<sup>2</sup>Department of Chemistry, University of North Carolina at Chapel Hill, Chapel Hill, North Carolina, 27599-3290, United States

<sup>3</sup>Spectroscopy, Quantum Chemistry and Atmospheric Remote Sensing (CP 160/09), Université libre de Bruxelles, 50 av. F. D. Roosevelt, B-1050 Brussels, Belgium

<sup>4</sup>Department of Chemistry and Pharmacy, Interdisciplinary Center for Molecular Materials (ICMM), Friedrich-Alexander-Universität Erlangen-Nürnberg, Egerlandstr. 3, 91058 Erlangen, Germany

<sup>5</sup>Chemistry Division, Brookhaven National Laboratory, Upton, NY 11973-5000, USA

\*Correspondence to: [ludovic.troian.@uclouvain.be](mailto:ludovic.troian.@uclouvain.be), [renatons@email.unc.edu](mailto:renatons@email.unc.edu)

#### **Table of contents**

|                                                                         |          |
|-------------------------------------------------------------------------|----------|
| <b><i>Excited-State Quenching Experiments</i></b> .....                 | <b>2</b> |
| <b><i>Dehalogenation Yields Using Green Light Irradiation</i></b> ..... | <b>6</b> |
| <b><i>NMR Characterizations</i></b> .....                               | <b>7</b> |

## Excited-State Quenching Experiments

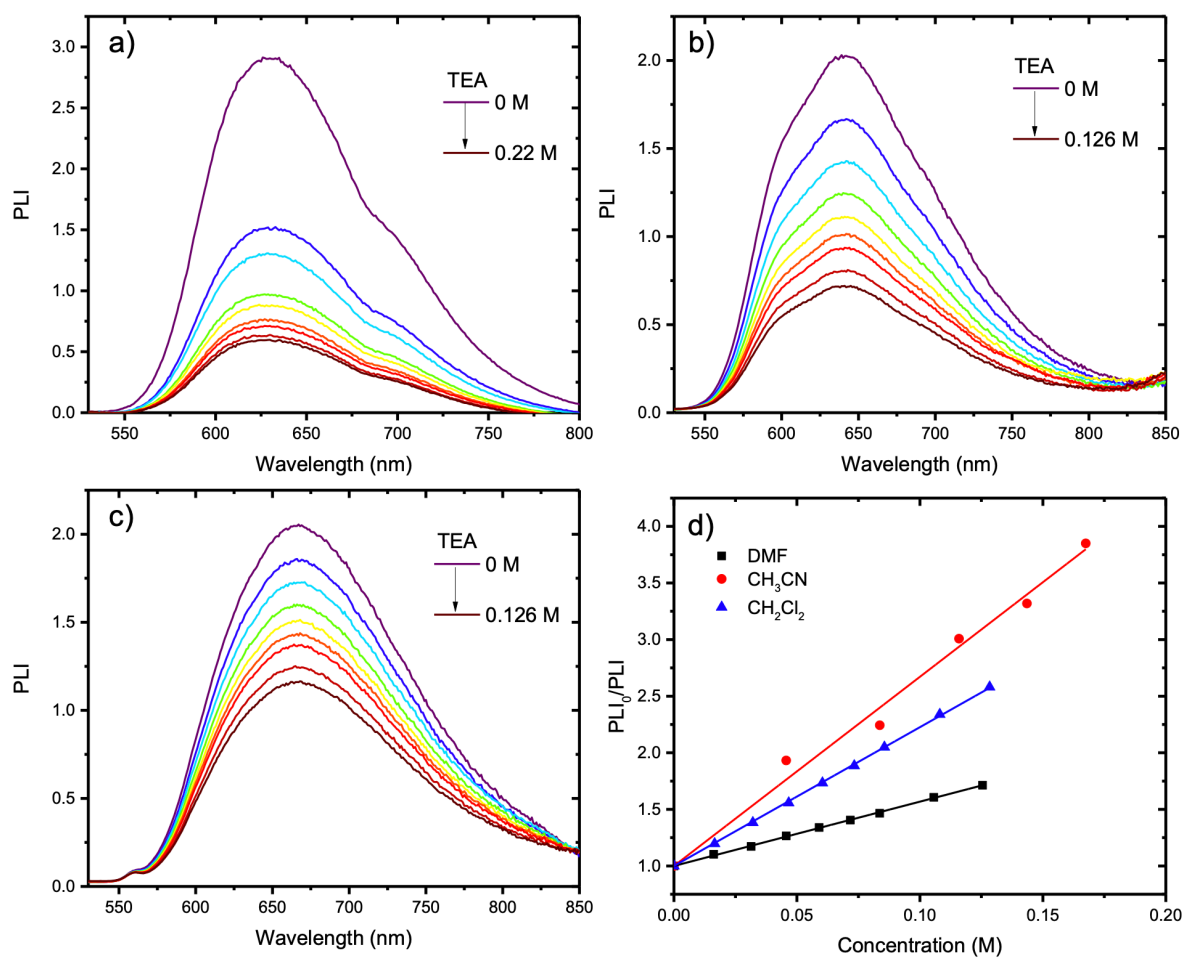

**Figure S1:** Excited-state quenching of  $[\text{Fe}(\text{phtmeimb})_2]^{+*}$  by triethylamine in argon-purged  $\text{CH}_3\text{CN}$  (a),  $\text{CH}_2\text{Cl}_2$  (b) and DMF (c). The corresponding Stern-Volmer plots are gathered in panel (d).

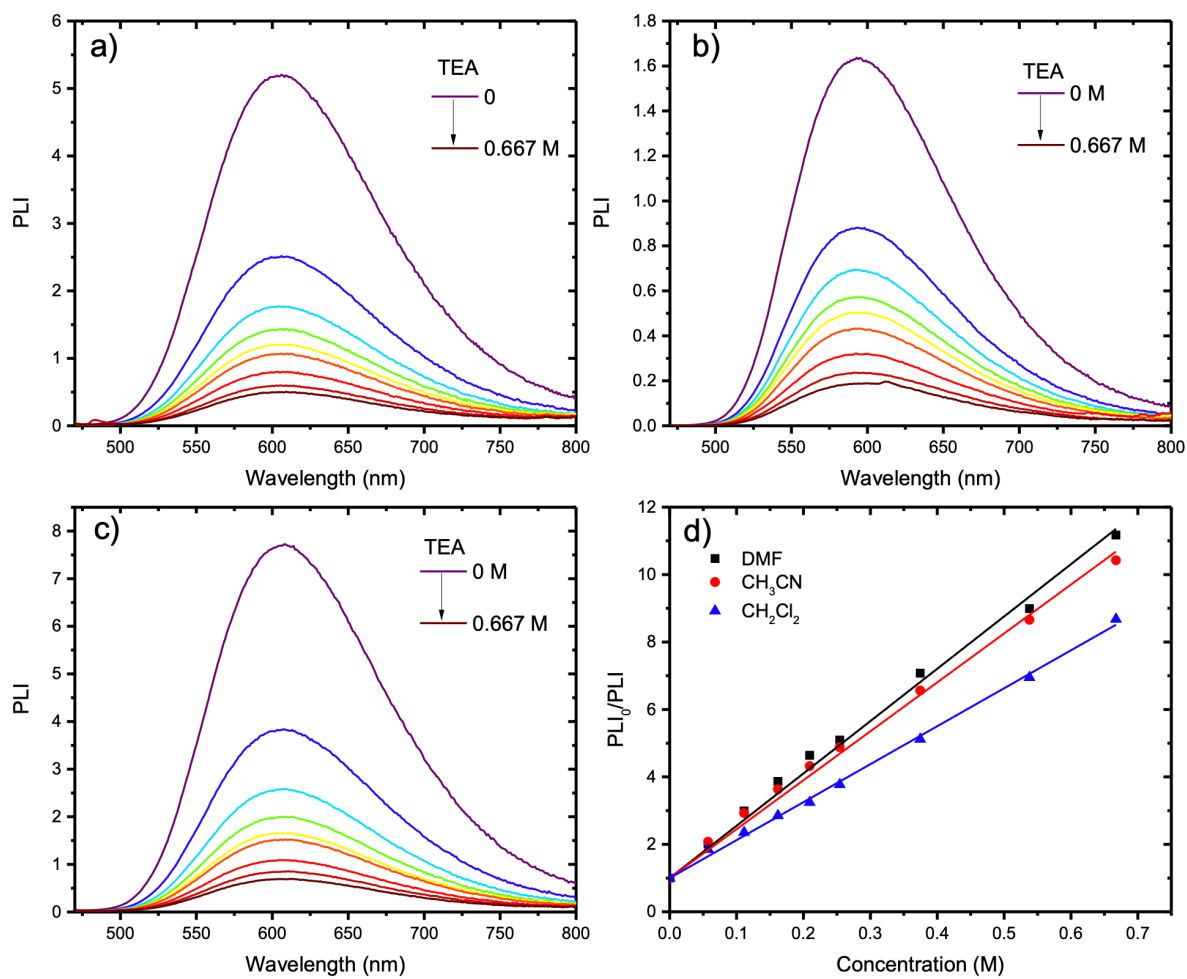

**Figure S2:** Excited-state quenching of  $[\text{Ir}(\text{ppy})_2(\text{bpy})]^{+*}$  by triethylamine in argon-purged  $\text{CH}_3\text{CN}$  (a),  $\text{CH}_2\text{Cl}_2$  (b) and DMF (c). The corresponding Stern-Volmer plots are gathered in panel (d).

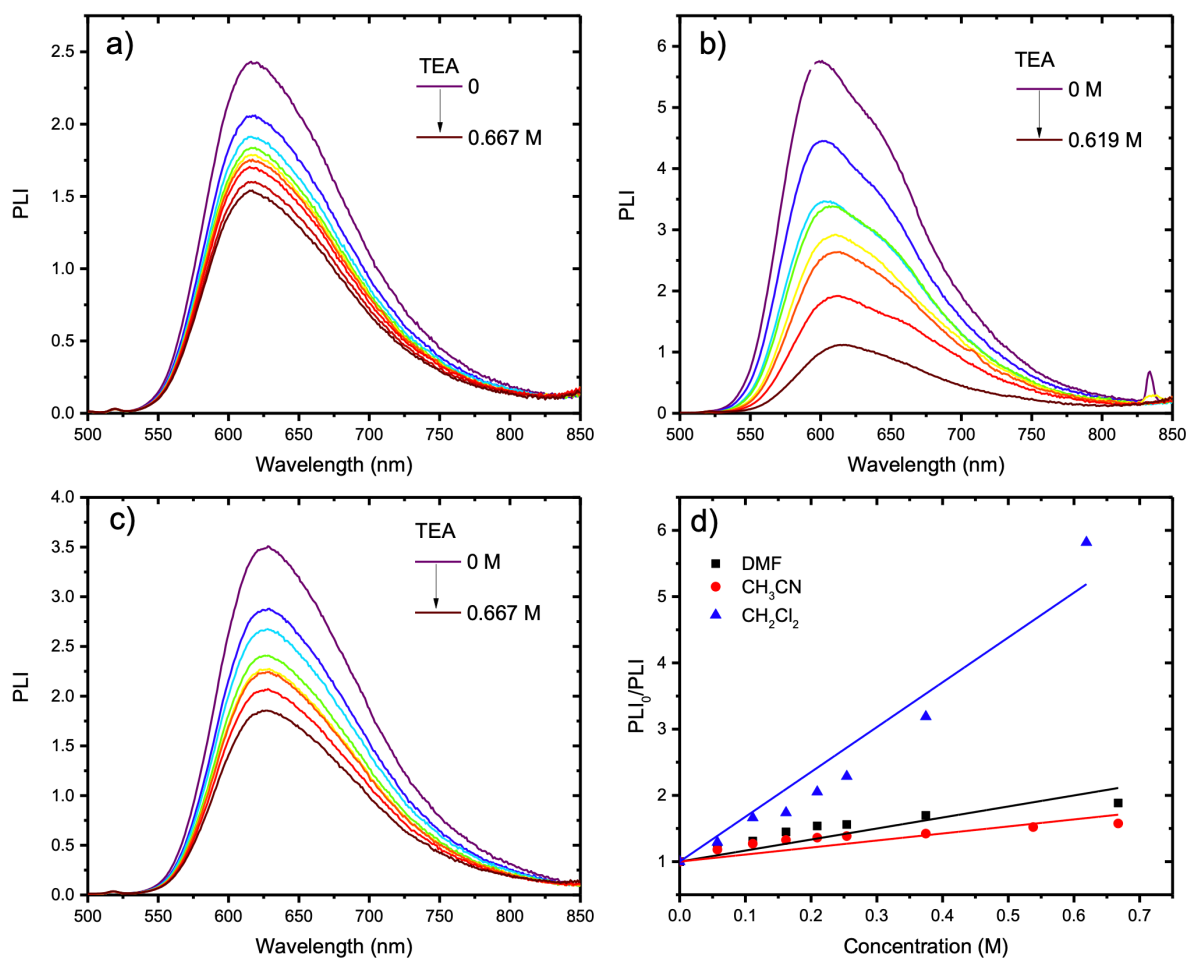

**Figure S3:** Excited-state quenching of  $[\text{Ru}(\text{bpy})_3]^{2+*}$  by triethylamine in argon-purged  $\text{CH}_3\text{CN}$  (a),  $\text{CH}_2\text{Cl}_2$  (b) and DMF (c). The corresponding Stern-Volmer plots are gathered in panel (d).

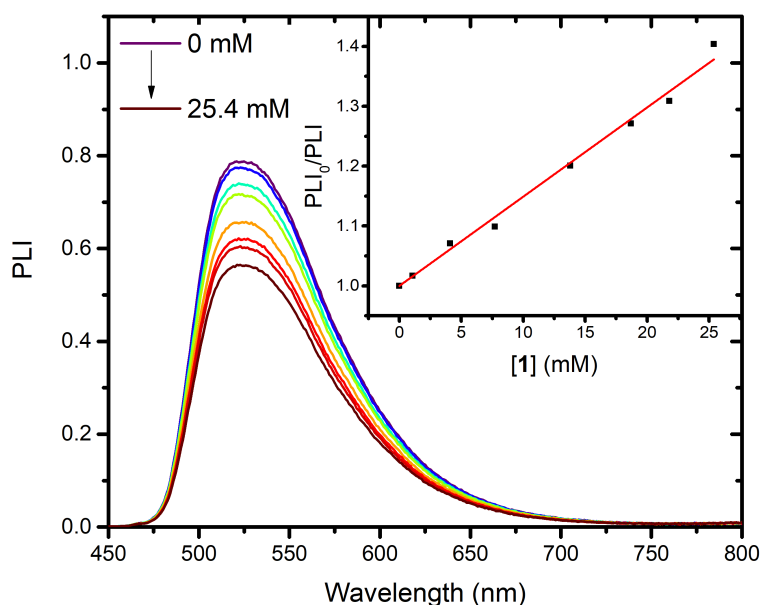

**Figure S4.** Excited-state quenching of  $[\text{Ir}(\text{ppy})_3]^*$  by triethylamine in  $\text{CH}_3\text{CN}$ . The corresponding Stern-Volmer plot is shown in the inset from which  $k_q = 7.45 \times 10^8 \text{ M}^{-1}\text{s}^{-1}$  was determined.

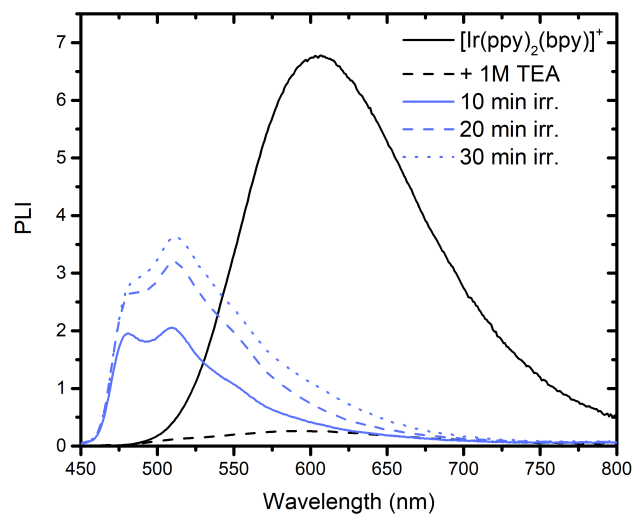

**Figure S5.** Evolution of the PL spectra of  $[\text{Ir}(\text{ppy})_2(\text{bpy})]^+$  in the presence on 1M TEA (black) and following blue light illumination for the indicated period of time (blue). Experiments were performed in argon purged acetonitrile at room temperature.

## Dehalogenation Yields Using Green Light Irradiation

Table S1. Yields of compounds 1-4 obtained with green light irradiation

|                                               | <b>CH<sub>2</sub>Cl<sub>2</sub></b><br><b>(1/2/3/4) (%)</b> | <b>CH<sub>3</sub>CN</b><br><b>(1/2/3/4) (%)</b> | <b>DMF</b><br><b>(1/2/3/4) (%)</b> |
|-----------------------------------------------|-------------------------------------------------------------|-------------------------------------------------|------------------------------------|
| <b>[Ru(bpy)<sub>3</sub>]<sup>2+</sup></b>     | 0/0/48/25                                                   | 0/0/47/9                                        | 0/0/55/23                          |
| <b>[Ir(ppy)<sub>2</sub>(bpy)]<sup>+</sup></b> | 0/0/43/18                                                   | 0/0/49/16                                       | 0/0/42/6                           |
| <b>[Fe(phtmeimb)<sub>2</sub>]<sup>+</sup></b> | 0/29/29/14                                                  | 72/4/15/2                                       | 75/4/1/4                           |

Conditions : PS (1 mol%), TEA (3.5 eq., 0.7 mmol), solvent (2 mL), green light, under inert atmosphere and under irradiation for 24h.

# NMR Characterizations

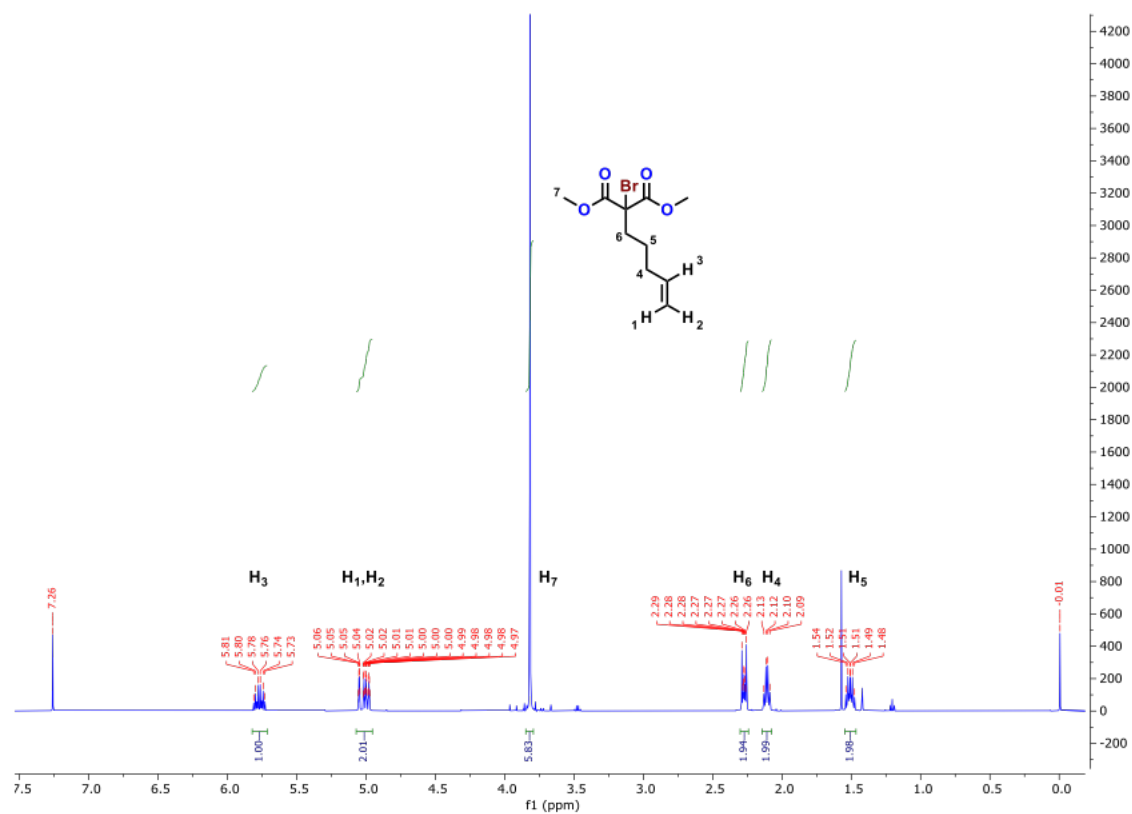

**Figure S6:** <sup>1</sup>H NMR spectrum of compound **1** recorded in CDCl<sub>3</sub> at 500 MHz and at 298 K.

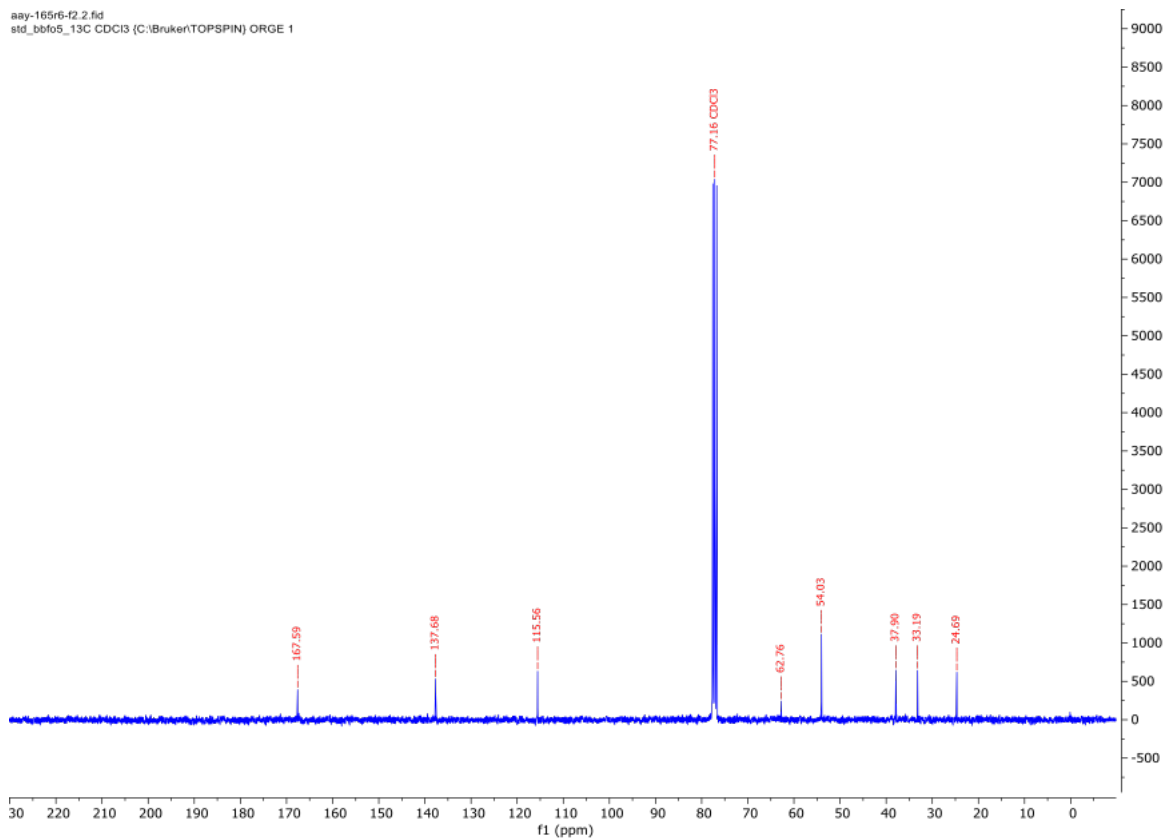

**Figure S7:**  $^{13}\text{C}$  NMR spectrum of compound **1** recorded in  $\text{CDCl}_3$  at 75 MHz and at 298 K.

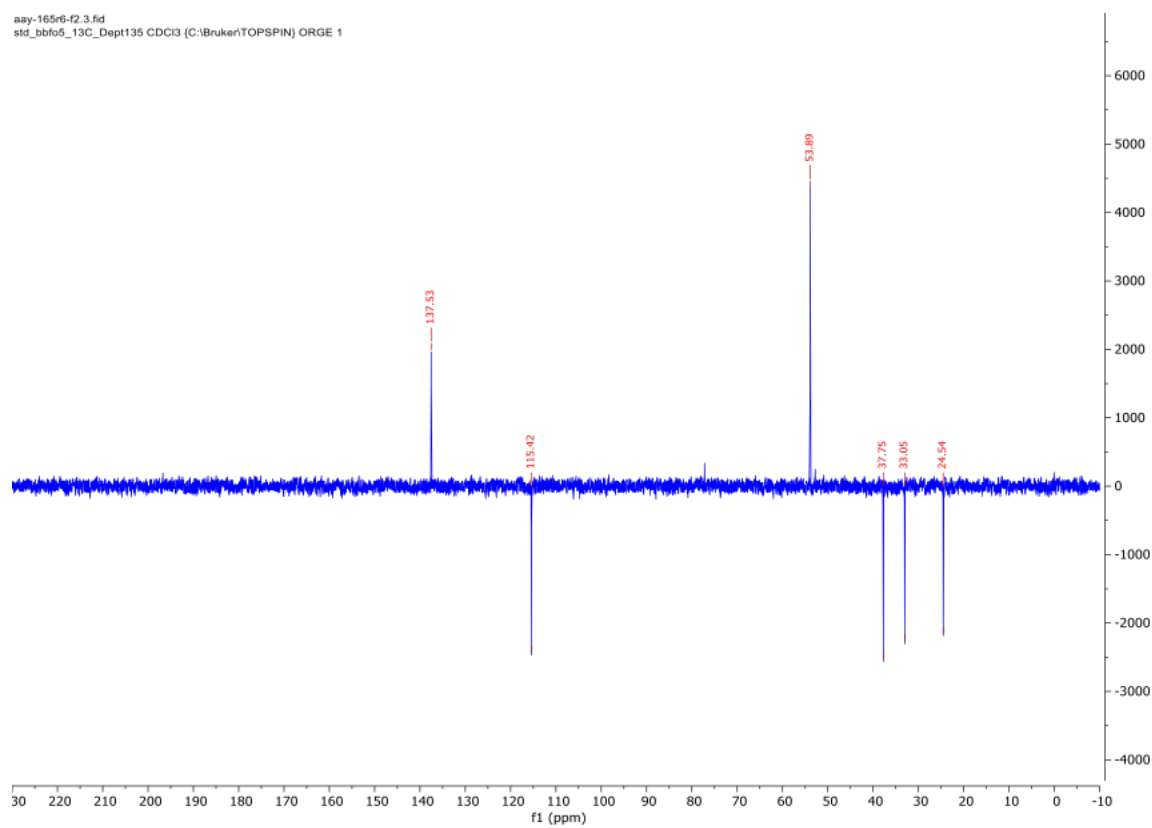

**Figure S8:**  $^{13}\text{C}$  DEPT 135 NMR spectrum of compound **1** recorded in  $\text{CDCl}_3$  at 75 MHz and at 298 K.



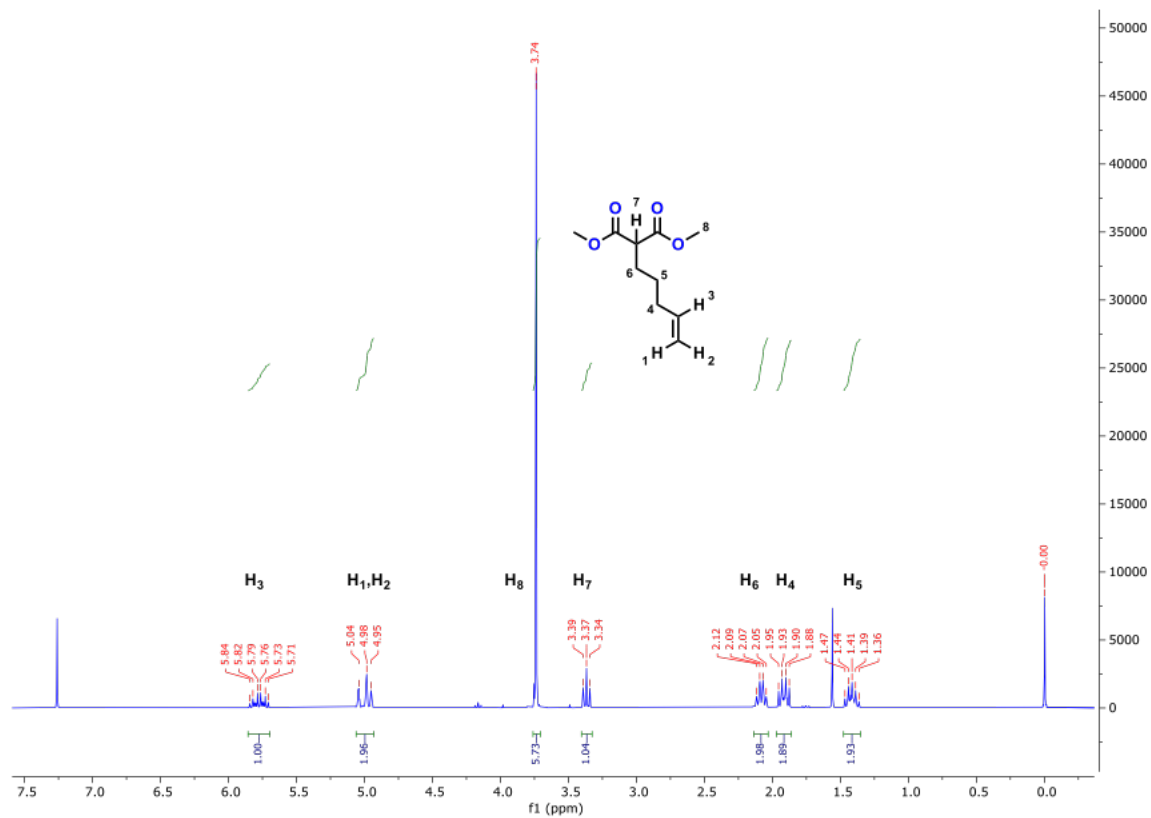

Figure S9: <sup>1</sup>H NMR spectrum of compound **2** recorded in CDCl<sub>3</sub> at 300 MHz and at 298 K.

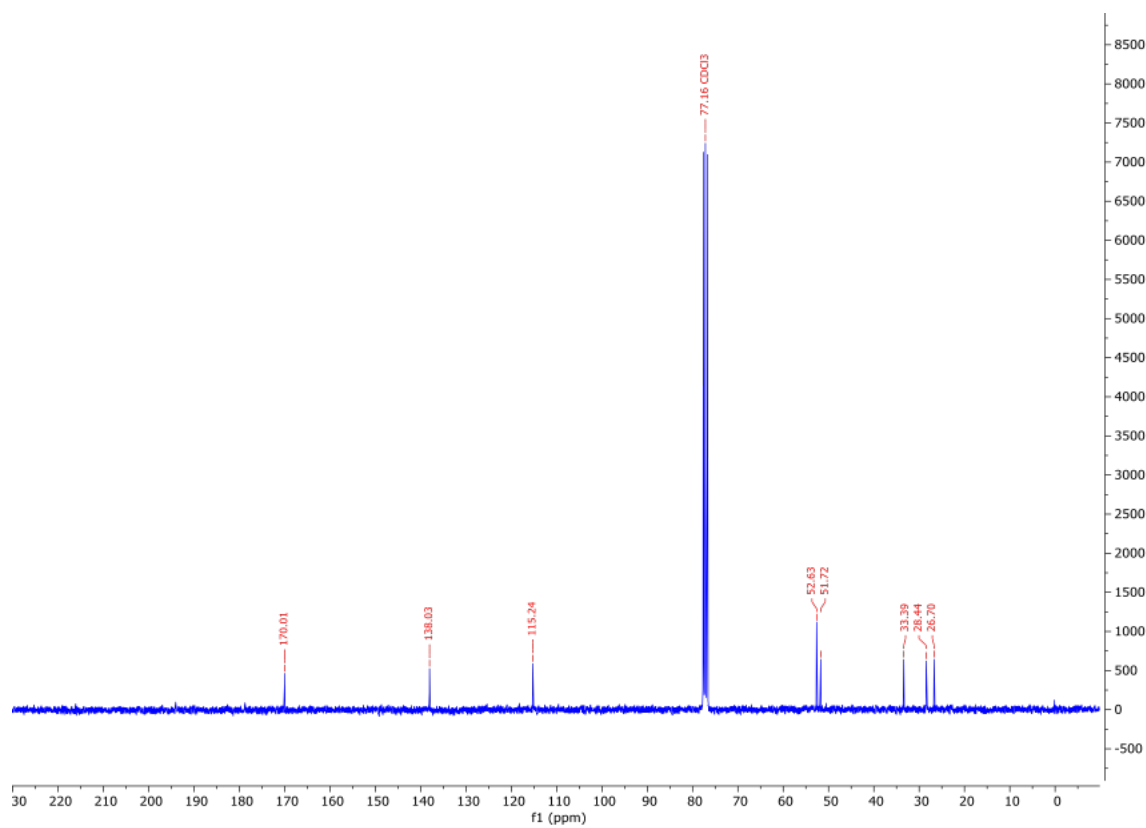

Figure S10: <sup>13</sup>C NMR spectrum of compound **2** recorded in CDCl<sub>3</sub> at 75 MHz and at 298 K.

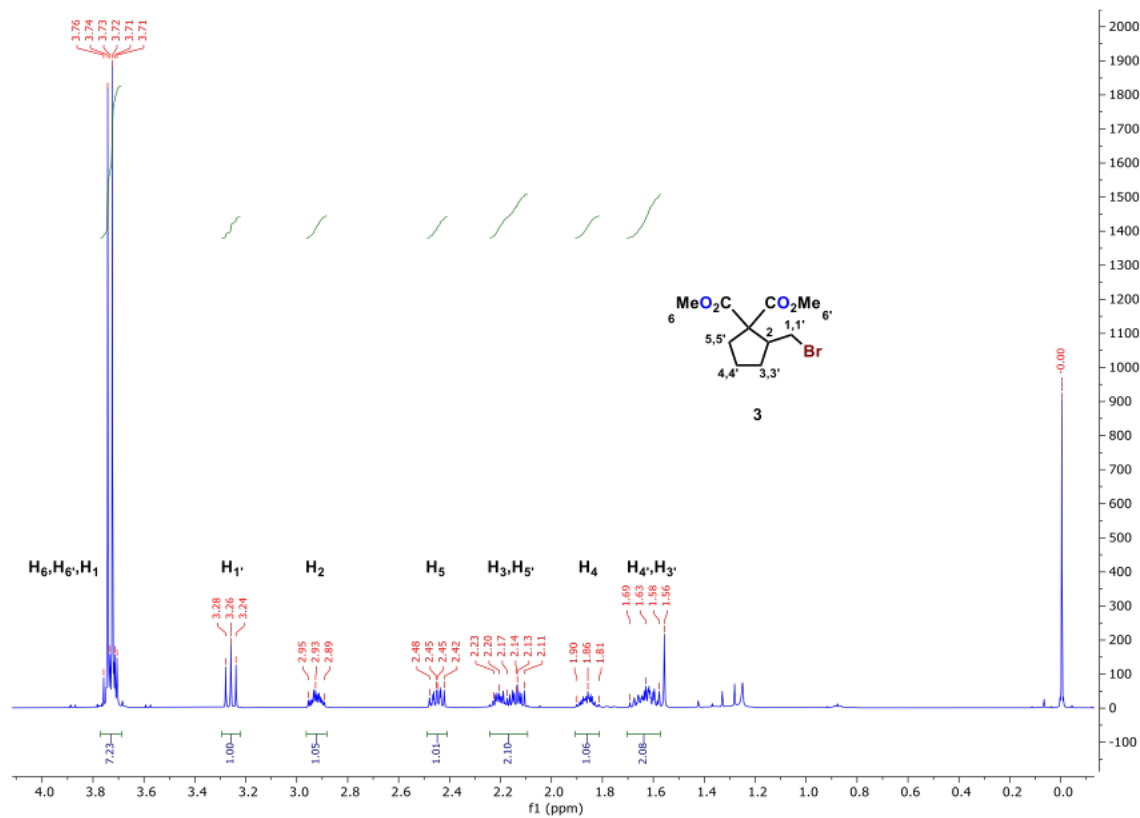

Figure S11:  $^1\text{H}$  NMR spectrum of compound **3** recorded in  $\text{CDCl}_3$  at 500 MHz and at 298 K.

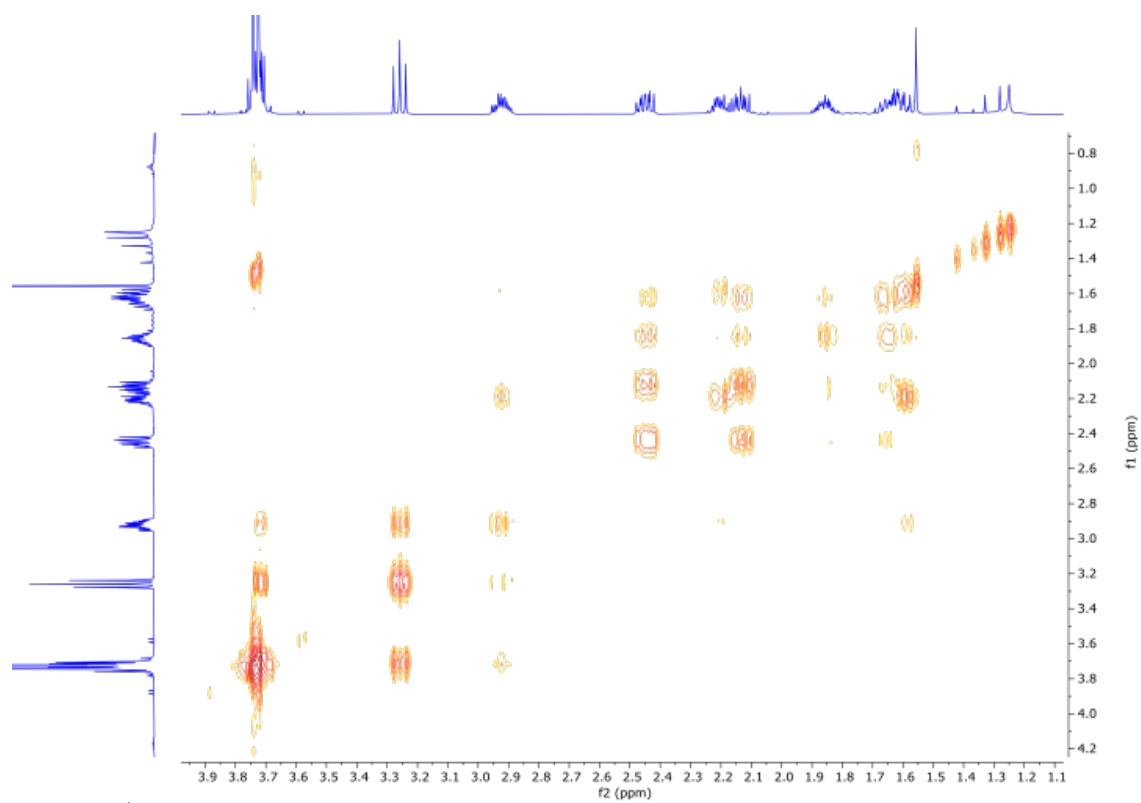

Figure S12:  $^1\text{H}$  COSY NMR spectrum of compound **3** recorded in  $\text{CDCl}_3$  at 500 MHz and at 298 K.

ay-PR-7-r3.1.fid  
purified product  
std\_bbf05\_13C CDCl3 (C:\Bruker\TOPSPIN) ORGE 1

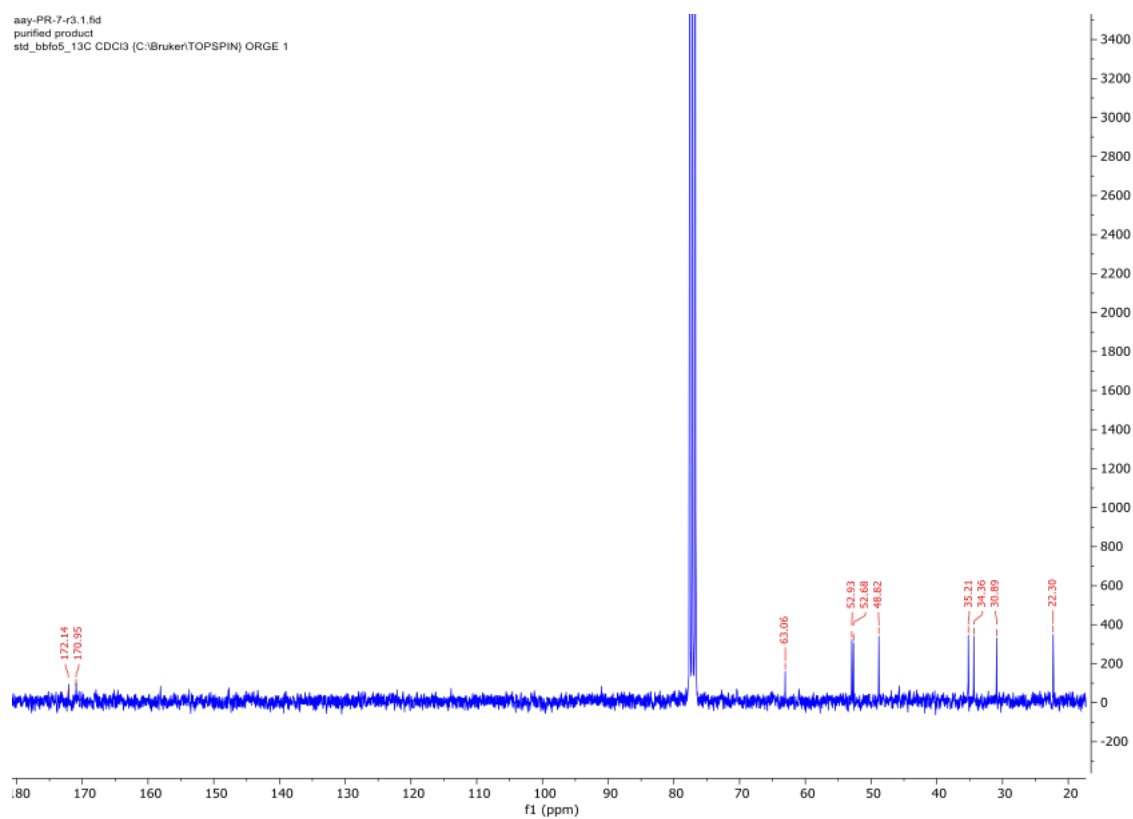

**Figure S13:** <sup>13</sup>C NMR spectrum of compound **3** recorded in CDCl<sub>3</sub> at 75 MHz and at 298 K.

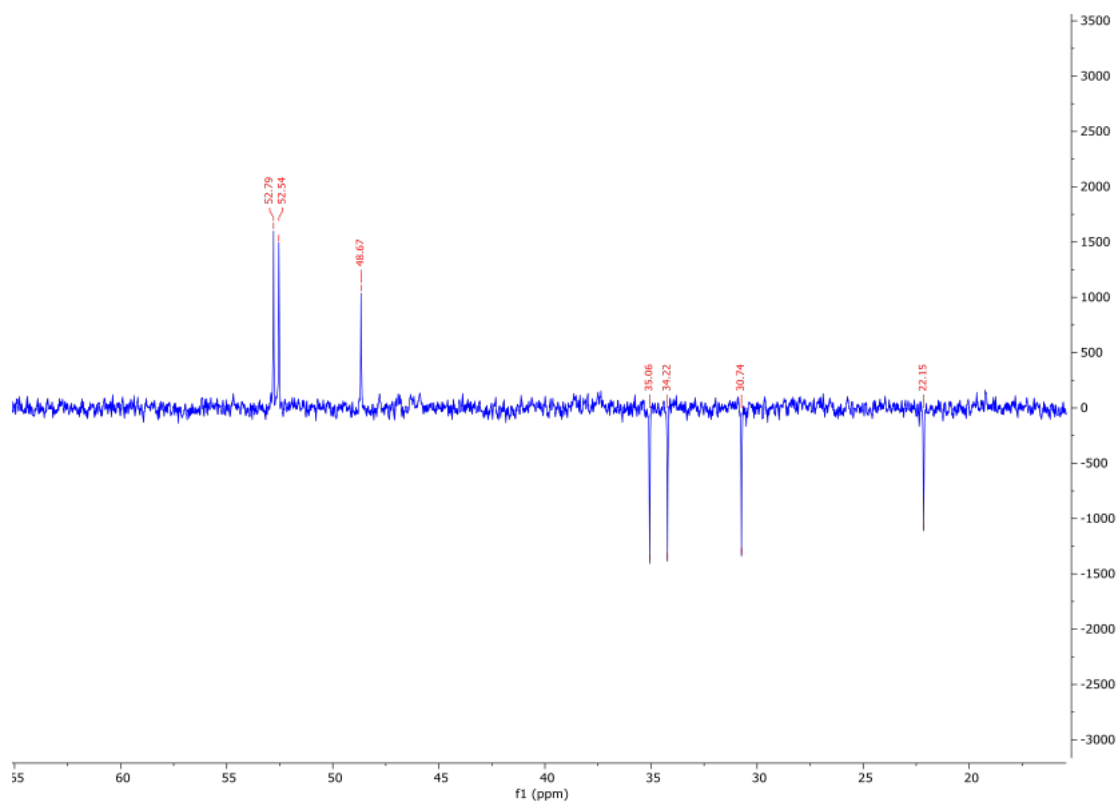

**Figure S14:** <sup>13</sup>C DEPT 135 NMR spectrum of compound **3** recorded in CDCl<sub>3</sub> at 75 MHz and at 298 K.

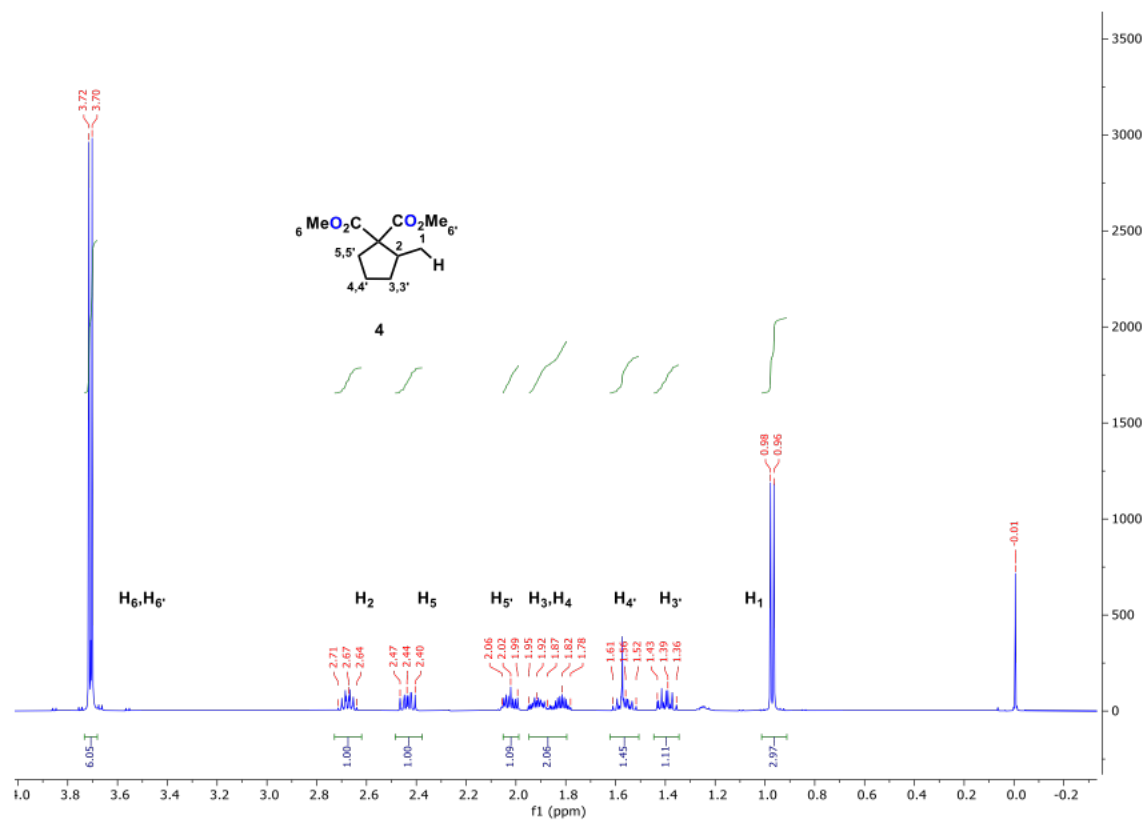

**Figure S15:**  $^1\text{H}$  NMR spectrum of compound **4** recorded in  $\text{CDCl}_3$  at 500 MHz and at 298 K.

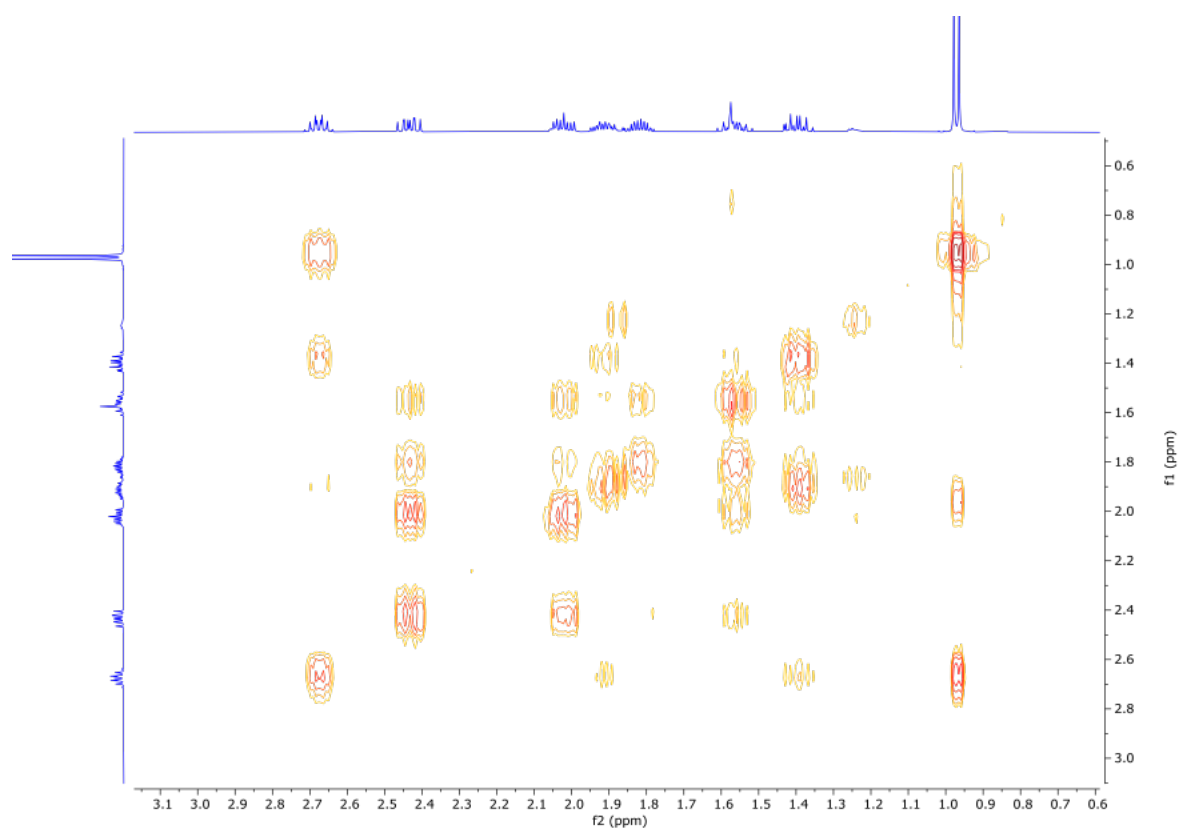

**Figure S16:**  $^1\text{H}$  COSY NMR spectrum of compound **4** recorded in  $\text{CDCl}_3$  at 500 MHz and at 298 K.

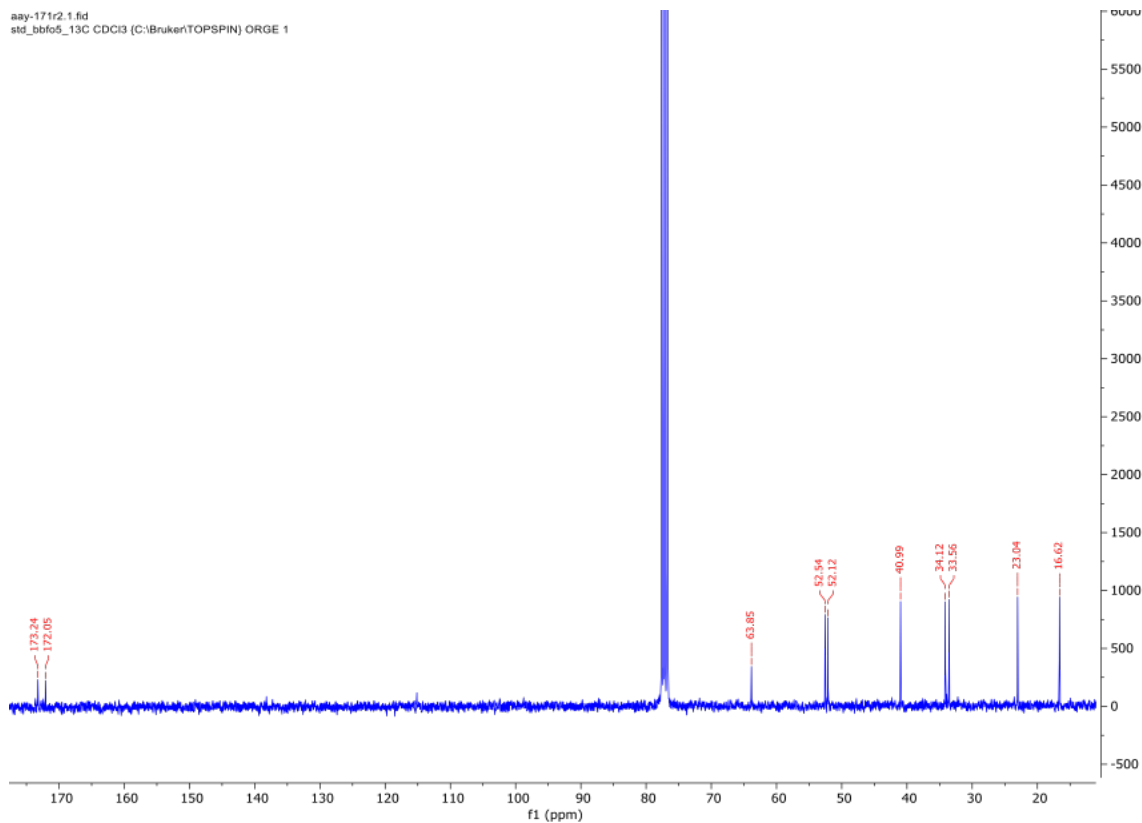

**Figure S17:**  $^{13}\text{C}$  NMR spectrum of compound **4** recorded in  $\text{CDCl}_3$  at 75 MHz and at 298 K.

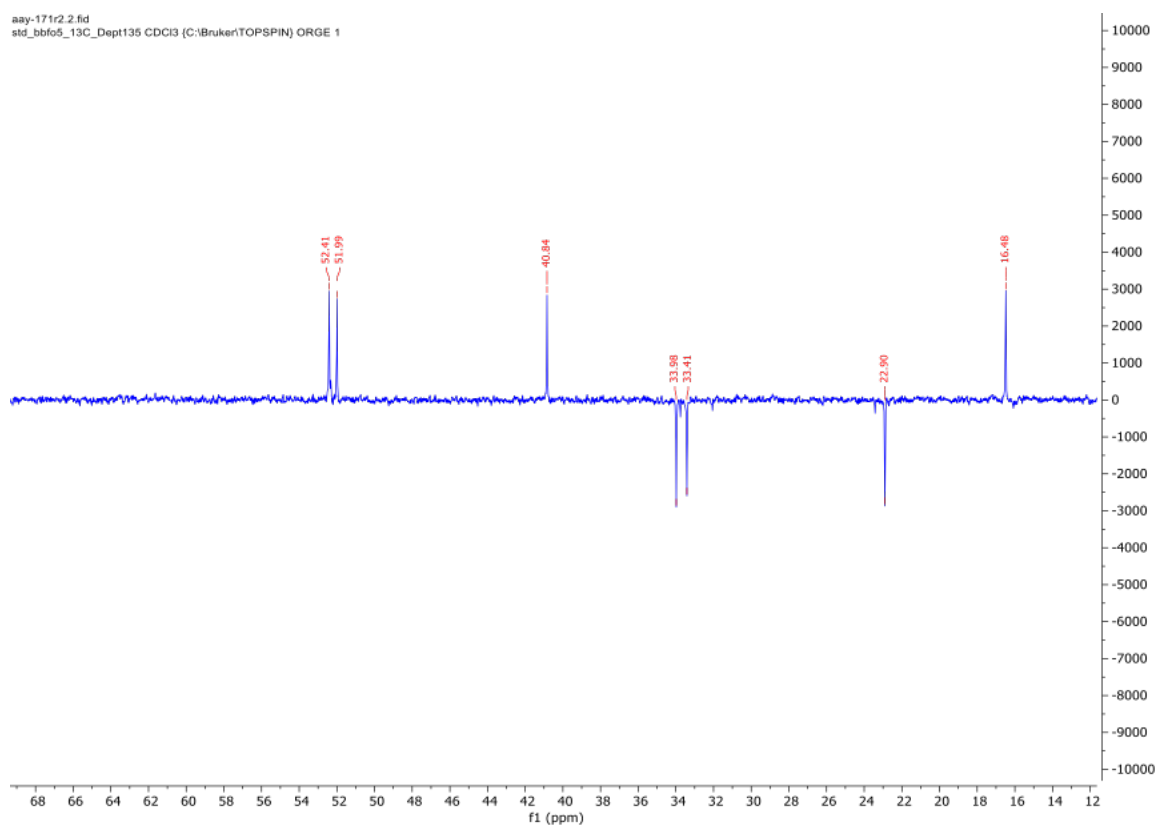

**Figure S18:**  $^{13}\text{C}$  DEPT 135 NMR spectrum of compound **4** recorded in  $\text{CDCl}_3$  at 75 MHz and at 298 K.
